# Supplementary material for: Kinetic Study of the Maillard Reaction in Thin Film Generated by Microdroplets Deposition
Source: MDPI journal article supplement (doi:10.3390/molecules27185747), 2022-09-06
Supplement: s1 [file s1]

# Kinetic Study of The Maillard Reaction in Thin Film Generated by Microdroplets Deposition

Chiara Salvitti\*, Giulia de Petris, Anna Troiani, Marta Managò, Andreina Ricci and Federico Pepi<sup>a\*</sup>

## Supplementary Materials

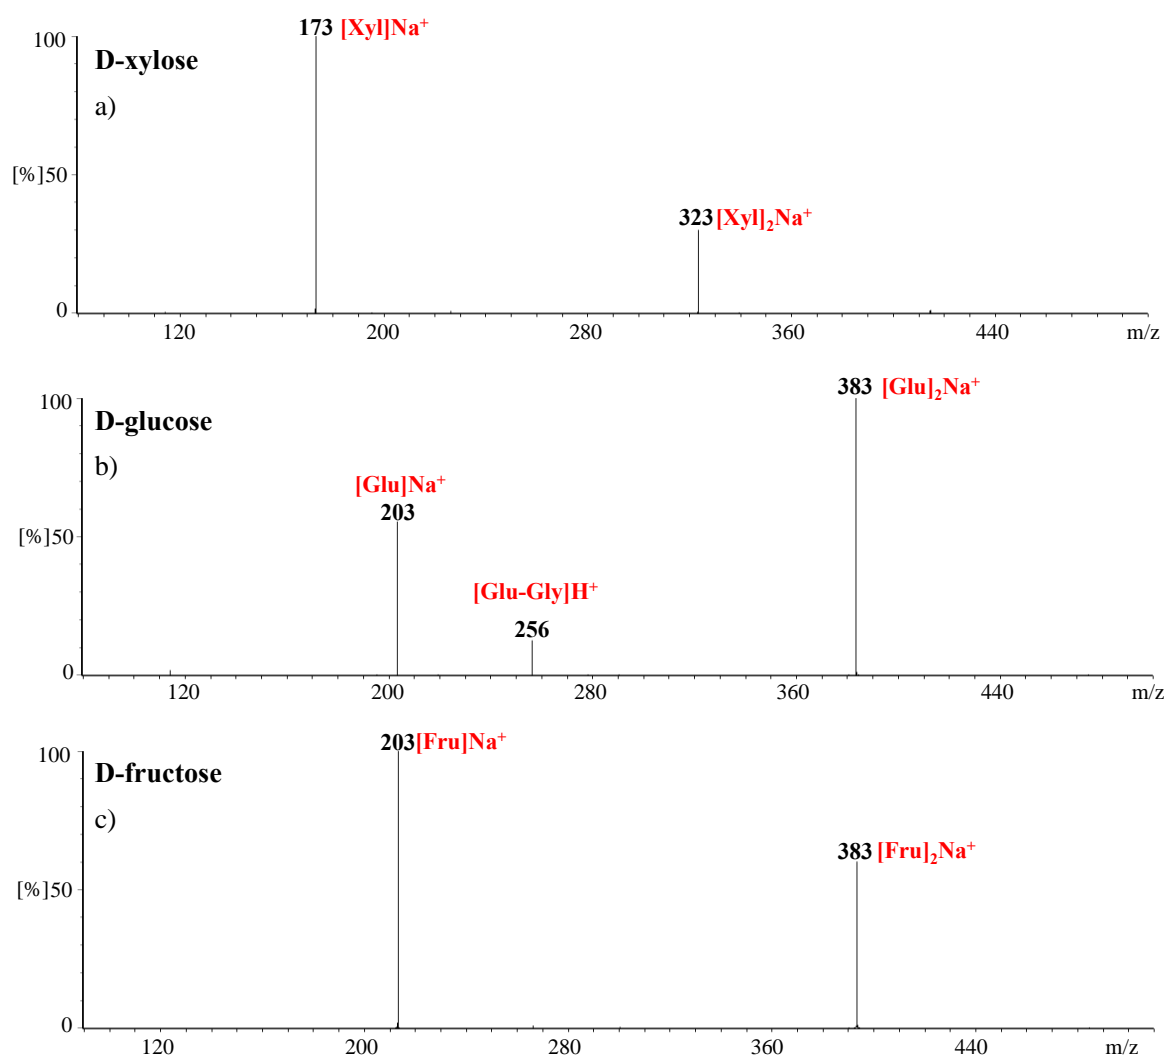

**Figure S1:** The ESI mass spectra of the starting solutions: a) 1 mL of 1:1 L-glycine/D-xylose  $10^{-3}$  M  $\text{H}_2\text{O}/\text{CH}_3\text{OH}$  3:1 solution; b) 1 mL of 1:1 L-glycine/D-glucose  $10^{-3}$  M  $\text{H}_2\text{O}/\text{CH}_3\text{OH}$  3:1 solution; c) 1 mL of 1:1 L-glycine/D-fructose  $10^{-3}$  M  $\text{H}_2\text{O}/\text{CH}_3\text{OH}$  3:1 solution.

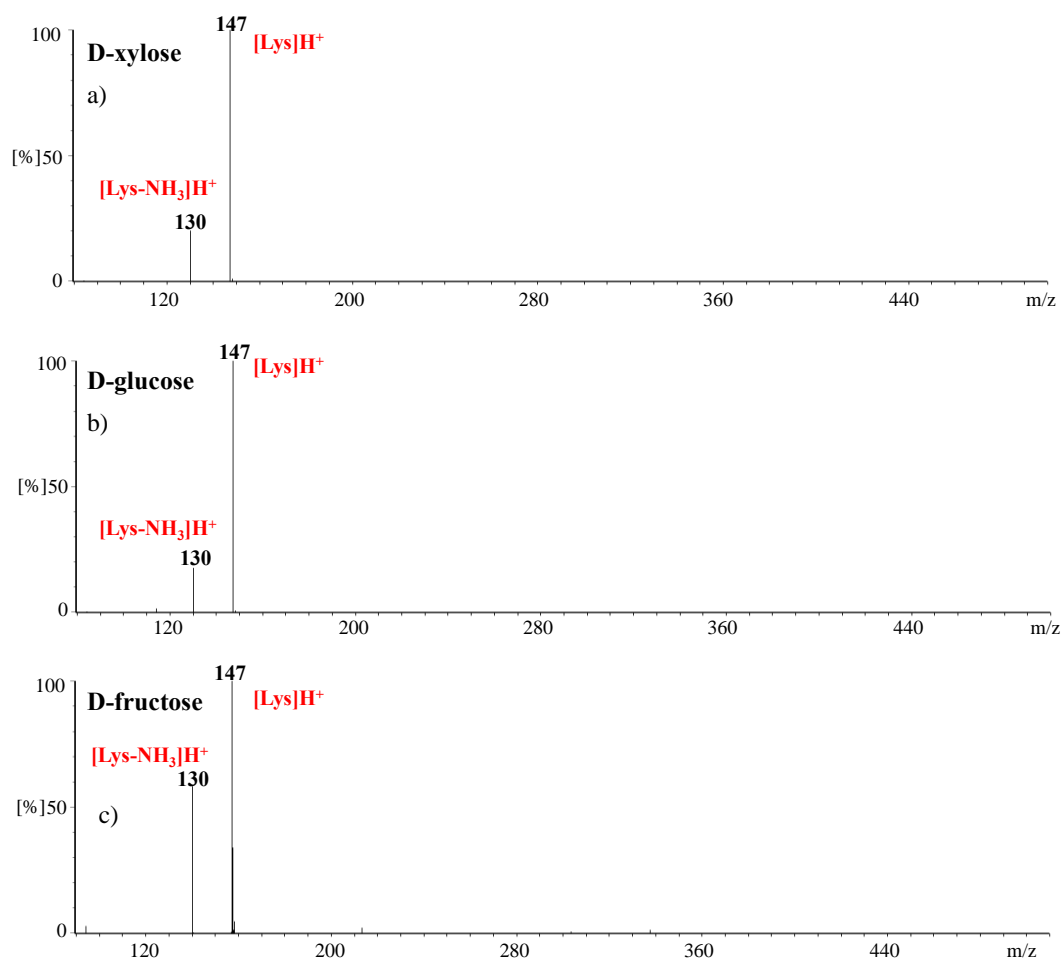

**Figure S2.** ESI mass spectra of the starting solutions: a) 1 mL of 1:1 L-lysine/D-xylose  $10^{-3}$  M H<sub>2</sub>O/CH<sub>3</sub>OH 3:1 solution b) 1 mL of 1:1 L-lysine/D-glucose  $10^{-3}$  M H<sub>2</sub>O/CH<sub>3</sub>OH 3:1 solution, c) 1 mL of 1:1 L-lysine/D-fructose  $10^{-3}$  M H<sub>2</sub>O/CH<sub>3</sub>OH 3:1 solution.

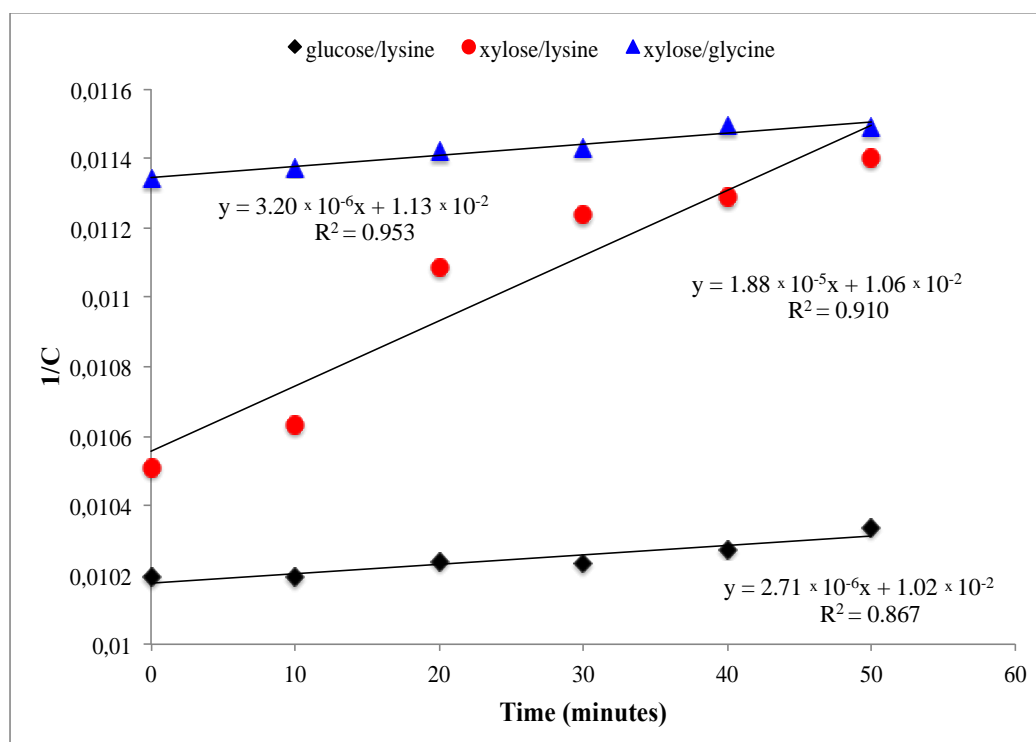

**Figure S3.** Kinetic plots of the reactions performed in bulk.
